# Supplementary material
Source: publisher figshare collection journal article supplement (https://sage.figshare.com/ndownloader/files/15592622)
Supplement: Supplementary file 1 [file 15592622]

**Cuando el conjuro se vuelve contra el propio brujo: la caída del gobierno de Alberto Fujimori, 1999-2000 – nuevas evidencias e interpretaciones**

Carlos Ugo Santander Joo y Carlos Federico Domínguez Avila

INTRODUCCIÓN

Durante los años 1960 a 1970, la mayoría de los países de América Latina pasaron por algún tipo de régimen autoritario. En general, ese período de autoritarismo fue resultado de las tensiones sociales y políticas producidas por crisis institucionales, por el proceso de industrialización, por cambios en el rol de la institución militar, y también por el polarizado contexto internacional. A partir de 1980, se observó una importante mutación política-social, que derivó en un conjunto de transiciones democráticas, entre ellas la peruana.

Esta nueva realidad demandó una actualización de la agenda de investigación, especialmente en el campo de la ciencia política (Guilhot y Schmitter, 2000: 615). Así, técnicas, enfoques y otros marcos teóricos, convalidados incluso en otras disciplinas, antes dominantes por presentar visiones macro orientadas y vinculadas al análisis económico y social, fueron substituidos por interpretaciones fundamentadas en el voluntarismo de los actores políticos.

Las transiciones pactadas en el sur de Europa y América Latina se erigieron en referentes del fenómeno. Así la habilidad de la clase política, la elección racional de los actores, y los recursos y efectos de sus estrategias serán los puntos claves de explicación (Linz y Stepan, 1990; Nolhen y Thibaut, 1995; Arturi, 2001). De ese modo, las transiciones democráticas se situaron en un modelo de análisis interpretativo basado en la interacción estratégica entre actores relevantes. Sin embargo, se dejaba abierta la posibilidad referente a la *incerteza*, dado que el cálculo muchas veces se encuentra limitado en situaciones de cambio y constante movimiento (O`Donnell y Schmitter,1991; Karl, 1991).

Más recientemente, a partir del surgimiento de un nuevo tipo de regímenes autoritarios diferentes de los regímenes autoritarios circunscritos a la época de la guerra fría – esto es, los llamados autoritarismos competitivos –, los estudios sobre democratización se revigoraron, dada la ausencia de modelos explicativos a partir de la secuencia del régimen autoritario-modo de transición-tipo de democracia (Levitsky y Way, 2002; Roessler y Howad, 2009).

La investigación comparada reciente viene arrojando luz para una mejor comprensión de este fenómeno. Se buscan interpretaciones explicativas y comprensivas del por qué algunos regímenes autoritarios competitivos se democratizaron después de 1989. Según algunos autores, la variable externa contribuye a la reestructuración de los incentivos nacionales y la distribución de poder, las mismas que serían decisivas para los resultados del régimen. Es decir, los diversos grados de presión internacional contribuyen a la democratización (Levistky y Way, 2010; Foweraker, 2004).

Por otro lado, algunos autores sostienen que el papel de las elecciones y la liberalización electoral tendría que ver con los momentos cruciales para la finalización de los regímenes autoritarios competitivos (Lindberg, 2009; Shirah, 2015). Se entiende que tales alternativas son una oportunidad para que la oposición, las élites y la sociedad civil articulen de forma más eficiente un conjunto de acciones que permitan revertir el autoritarismo (Howard y Roessler 2006). Para eso es necesario distinguir regímenes autoritarios competitivos de regímenes autoritarios hegemónicos. Se presupone que los primeros serían más propensos a cambios en pro de la democracia si se combina presión nacional e internacional (Donno, 2013).

En esta perspectiva neoinstitucionalista, el presente trabajo busca contribuir para entender el papel de las instituciones en los procesos de transición. Y compartimos el argumento que atribuye a los arreglos institucionales relevancia crucial en los procesos de democratización. Si bien el autoritarismo fujimorista no fue vencido única o exclusivamente por las acciones emprendidas por una coalición democratizadora, se puede afirmar que las propias reglas electorales – sumado a otras variables, como la crisis económica y alguna presión de la comunidad internacional – finalmente contribuyeron a la erosión y a la caída del propio régimen autoritario. Si bien existe un conjunto de condiciones semejantes a la caída de otros regímenes autoritarios en el mundo es importante destacar las circunstancias particulares del Perú a fines del año 2000.

Para los fines del presente artículo, es pertinente tener presente que la transición política es el intervalo que se extiende entre un régimen político y otro, delimitado de un lado por el inicio del proceso de disolución del régimen autoritario y, del otro, por el establecimiento de algún otro régimen (O`Donnell y Philippe Schmitter,1991). En consecuencia, el régimen autoritario que se estableció en Perú con el quiebre del orden constitucional, el 5 de abril de 1992, inició un proceso de aparente restitución del orden democrático de acuerdo a los compromisos adquiridos internacionalmente, este periodo puede denominarse de flexibilización o de distensión política materializado en la convocatoria a la elección de 1993 del denominado Congreso Constituyente Democrático (CCD) el mismo que aprobó la Constitución de 1993, periodo que luego culminará con las elecciones generales de 1995 con la reelección de Alberto Fujimori (Cotler, 2000).

Sin embargo, a la aparente restitución del orden democrático constitucional con las elecciones generales de 1995, le siguió una regresión autoritaria, evidenciándose un amague de afirmación del régimen democrático.

Cabe esclarecer que existe abundante literatura que describe y busca explicar el autoritarismo en el Perú de los años 1990. Sin embargo, no existen estudios que expliquen la transición política desde punto de vista de los efectos producidos por las instituciones preexistentes o como un objeto específico de estudio. En el proceso de cambio de régimen algunos autores sobredimensionan el papel de la sociedad civil (Deza, 2004), o se circunscriben a la satisfacción mínima de democracia a partir de la naturaleza del régimen autoritario del Perú de Fujimori, que era una democracia formal, es decir, no era una dictadura convencional y si un autoritarismo competitivo, y sólo se podría hablar de transición o de cambio de régimen al re-establecimiento de una situación de competencia política plena (Tanaka, 2005).

De ahí que el debate sobre la democracia en el Perú se haya extendido por largo tiempo y centrado en los partidos políticos o en la naturaleza del sistema de partidos como protagonistas de una democracia mínima o procedimental. A esta visión restringida sobre la naturaleza del cambio de gobierno en el Perú se suma el sobre-dimensionamiento de la variable internacional, la que expone el papel del gobierno de los Estados Unidos y la Agencia Central de Inteligencia (CIA) en la disolución del pacto Fujmori-Montesinos, que habría desencadenado la caída del gobierno, al revelarse las cuentas del asesor Vladimiro Montesinos en Suiza (Cotler y Grompone, 2000), sumada a la revelación de los vínculos de Vladimiro Montesinos con el narcotráfico y la venta de armas a las Fuerzas Armada Revolucionarias de Colombia (FARC), (Tanaka, 2000 y 2005) y con ello el posterior análisis y descripción del papel de la OEA como misión mediadora del conflicto en el contexto de transición (Soria, 2009).

REGLAS DISTORCIDAS

La documentación consultada sugiere que Alberto Fujimori confiaba de que triunfaría en las elecciones de abril del año 2000. Los tres años anteriores invirtió todos los medios legales y políticos para aprobar en el Congreso una segunda reelección presidencial – que estaba constitucionalmente prohibida. Desde la perspectiva fujimorista se daba como cierto que el sistema electoral le proveería los resultados esperados para ganar y también para mantener inalterada su posición de dominio en el Congreso.

Ciertamente, Alberto Fujimori tenía una posición hegemónica en el marco general del sistema político local. Téngase presente que él, Fujimori, era el único candidato con liderazgo nacional. Su partido, rebautizado como Alianza Electoral Perú 2000, fuertemente centrado en su figura, lo consideraba como insubstituible, principalmente en razón de sus éxitos gubernamentales en materia de estabilización económica y de lucha antisubversiva. Ello provocaba una gran dificultad de transferir a un posible sucesor su capital político. Paralelamente, los partidos más tradicionales e históricos del país estaban en una situación muy poco confortable o auspiciosa (Tanaka, 1999; Kenney, 2004). Delante de la ausencia de competidores fuertes, al fujimorismo no le cabía razón para promover modificaciones sustanciales en el sistema electoral – por resultarle, esencialmente, ventajoso.[[1]](#endnote-2)

Así las cosas, a pesar de los cambios constitucionales en 1993, se mantuvo el sistema proporcional, la introducción de la cifra repartidora en la modalidad del Método D`Hondt, y la forma de elegir candidatos bajo la modalidad del voto preferencial – reforzando la personalización de las elecciones. Por otro lado, se adoptó el unicameralismo, se redujo el número de parlamentarios de 240 a 120 congresistas, y se creó una sola circunscripción electoral o Distrito Electoral Único. Todo ello acabó propiciando la emergencia de un sistema de representación pura. Es decir, la más alta proporcionalidad entre votos y escaños.

En las elecciones de 1992 y 1995 no menos de 10 agrupaciones consiguieron representación en el Congreso. Para las elecciones del año 2000 se confirmaría una tendencia de creciente fragmentación (Tuesta, 1995 y 1996). Esa alta y creciente fragmentación era estimulada por una legislación electoral que permitía la proliferación sin control de movimientos y agrupaciones independientes, equiparados a los partidos políticos ya constituidos. Por otro lado, era posible constatar inconsistencias en la ley, sobre todo en lo concerniente a la no implementación de mecanismos de control más eficientes para la verificación de firmas con el propósito de inscripción de un partido, o la indiferencia delante de la verificación del funcionamiento de comités en el territorio nacional.

Sea como fuere, la legislación electoral del año 2000 acabó: a) alentando plataformas electorales independientes que tornaban menos visibles las opciones partidarias, b) dispersando las preferencias electorales en varias candidaturas presidenciales, y c) fragmentando la concentración del voto para las elecciones legislativas.[[2]](#endnote-3)

Colocada toda la maquinaria del gobierno a favor del candidato-presidente, los únicos adversarios realmente competitivos contra el fujimorismo eran los partidos políticos que apenas tenían representación en el Congreso de la República. Fuera del Congreso y de los partidos, surgieron liderazgos alternativos – *outsiders –*, quienes contribuyeron a invisibilizar las candidaturas de los partidos. Los cuatro principales líderes en la competencia electoral del año 2000 terminaron siendo Alberto Fujimori, Alberto Andrade, Luis Castañeda y Alejandro Toledo. Cada uno se esforzaría por ocultar cualquier tipo de vínculo con los viejos partidos políticos, de ahí su énfasis en autodenominarse como “independientes”.

A pesar de la censura autoimpuesta por un importante sector de los medios de comunicación – a cambio de recibir beneficios económicos del gobierno y limitar la cobertura de los partidos opositores (Bowen y Holligan, 2003: 360-61) –, la opinión pública acabó siendo sensibilizada tanto por el contexto de crisis económica como por las desmesuradas arbitrariedades del gobierno que buscaba imponerse abusivamente.

Entre los meses de abril, mayo y junio de 1999, las encuestadoras Apoyo (1999), de la Universidad de Lima (1999) y Datum (1999) registraron una tendencia de estancamiento de la candidatura de Alberto Fujimori en una oscilación entre el 25% y 27%. Siendo superado inicialmente por pocos puntos porcentuales, por su contendor, el alcalde de Lima Alberto Andrade, del movimiento Somos Perú. Un tercer candidato, Luis Castañeda Lossio – exgerente de los servicios de salud del Estado –, se posicionaba entre 11% y 24%.

En junio de 1999, las candidaturas de Andrade y de Castañeda iniciaron una tendencia decreciente. Ello fue resultado de hostigamientos a ambos candidatos opositores por medio de la prensa vinculada al gobierno, por los escándalos de renuncia de miembros de sus partidos, y por la carencia de estrategias de comunicación coherentes. Inversamente, Fujimori comenzó a repuntar en las encuestas, llegando a 35% de intención de voto en el mes de agosto.

En ese contexto de creciente polarización electoral, uno de los pocos medios que mantuvo su independencia fue la revista Caretas. En su Edición n. 1584 (Setiembre 9, 1999b), ese medio denunció el plan sistemático de acciones del gobierno para desestabilizar las candidaturas adversarias. Y aún después de la implementación de una estrategia agresiva contra sus adversarios, el candidato Fujimori no despuntaba significativamente en las encuestas como para ganar los comicios en la primera vuelta.

Oficializadas las candidaturas en diciembre, y con pocas alteraciones en las encuestas hasta fin del año de 1999, el candidato independiente Alejandro Toledo recién aparecerá en febrero de 2000, con el 10% y como tercer candidato alternativo. Repuntará sorpresivamente durante el mes de marzo pasando de 24% a 32%, con una tendencia que dejaba cada vez más a Fujimori sin probabilidades de ganar en la primera vuelta – previstos para el día 9 de abril de 2000.

Paradojalmente, la candidatura Fujimori acababa siendo erosionada por un conjunto de reglas que – en principio – deberían apuntar a asegurarle un triunfo. Ello se fundamentaba en un distorsionado sistema electoral, caracterizado además por el fuerte componente volátil de las preferencias electorales, por la alta fragmentación y por la dispersión de los partidos políticos. De modo que el partido fujimorista fue rebasado por los mismos movimientos independientes generados por el sistema electoral. Y ahora sabemos que, en el primer semestre de 2000, el partido de gobierno sucumbió a su equivocada estrategia de pretender su continuidad en el poder bajo los artificios electorales engañosos, que, si bien buscaban minar a los partidos políticos, alentaban la representación de los outsiders – esto es, por candidatos como Alejandro Toledo y otros.

RESULTADOS INESPERADOS

El 9 abril de 2000, el candidato-presidente Alberto Fujimori no consiguió revalidar electoralmente una hegemonía claramente mayoritaria. Aunque fue el candidato más votado (49,87% de los votos válidos), no logró evitar la segunda vuelta. Además, perdió la mayoría absoluta en el parlamento. Finalmente, en una segunda vuelta realizada el día 28 de mayo, Fujimori, en comicios bastante deslucidos y de dudosa credibilidad, reivindicó una aplastante mayoría (74,33% de los votos válidos). Declarados los resultados, la sociedad y los políticos opositores contemplaron impotentes una situación de hechos consumados.

<<<<<CUADRO 1 AQUÍ>>>>>

La asunción formal de Fujimori camino a su tercer gobierno se produjo el 28 de julio en medio de un tumultuoso caos de rechazo ciudadano en la capital, del que resultaron 6 muertos a manos de agentes del gobierno. En un clima agitado y tenso, y a pesar de su cuestionada legitimidad en tan controvertido proceso electoral, Fujimori dio inicio a su período. Como principal novedad en el campo político se constató la – menos favorable – configuración del Congreso para los oficialistas.

Efectivamente, el fujimorismo congregado en la denominada Alianza Electoral Perú 2000 no alcanzó la mayoría en el Congreso de la República, por cuanto solamente obtuvo 52 de las 120 curules del Congreso (Cuadro 1). Los partidos y movimientos declarados opositores al fujimorismo consiguieron superar las 60 curules. Delante de esa equilibrada correlación de fuerzas en el parlamento, las oposiciones apelaron por todos los medios institucionales para que el régimen iniciase un proceso de redemocratización o de lo contrario se amenazaría la estabilidad del gobierno.

Al mismo tiempo, la oposición en el Congreso tuvo que replantear su accionar político. Luego de superar algunas desavenencias ideológicas y personales a fin de defender la democracia, los opositores, aún antes de las elecciones de abril, firmaron un Pacto de Gobernabilidad, en diciembre de 1999. El documento en referencia, que fue suscrito por 14 agrupaciones políticas, reivindicaba, entre otras cuestiones, la independencia de poderes, la disciplina fiscal, el manejo responsable de la economía y el destierro de la reelección inmediata.

En esa misma línea surgió, después de las elecciones de 2000, el denominado Comité Parlamentario por la Democracia-Copade. Dicho bloque de legisladores opositores resultó ser la mejor tentativa articulada desde el fin de la elección, sobre todo para enfrentar la cooptación por medios ilícitos de congresistas opositores por parte del oficialismo. Y rápidamente ese bloque opositor colocó en la agenda parlamentaria la necesidad de promover la vacancia presidencial.[[3]](#endnote-4) Delante de esta amenaza, el Ejecutivo buscó reclutar nuevos parlamentarios que asegurasen la continuidad de la estructura jurídica construida por el régimen y anular cualquier intento de redemocratización venida desde el Legislativo.

La pérdida del control del Congreso generó una mayor polarización y endurecimiento de posiciones contra el gobierno. En este contexto, la Organización de Estados Americanos-OEA se ofreció a promover el diálogo a fin de superar el conflicto e impase suscitados. Los opositores, con la esperanza de voluntad de cambio en vista de un nuevo contexto que cuestionaba tanto la legitimidad del mandato presidencial como la correlación de fuerzas al interior del Congreso, buscaron imponer una agenda democratizadora de 29 puntos. Así las cosas, parecía claro que al interior del Legislativo era imposible una negociación, dado que el sector más radical del gobierno en el Congreso, más allá de querer dominar a todo costo la institución, poco le interesaba promover reformas democratizadoras.[[4]](#endnote-5)

En el transcurso del mes de agosto, y ante el doble discurso que caracterizó la estrategia del gobierno, se evidenció en los hechos la poca disposición del régimen de llegar a acuerdos*.* El 14 de agosto, por ejemplo, el presidente Fujimori declaraba que los 29 puntos en agenda “sólo son propuestas para el diálogo y no reformas.” Asimismo, el ministro de Justicia, Alberto Bustamante, declaraba que “nosotros asumimos nuestro compromiso con la OEA con la idea de participar en la discusión de 29 temas, y no con la de llegar a una conclusión” (Caretas, Agosto 17, 2000c).

La oposición como protesta desconoció a la Comisión Democratizadora del Gobierno. Igualmente, se pasó a reivindicar del propio mandatario un cronograma concreto con plazos y medidas específicas de resultados comprobables monitoreados por la OEA, con el objetivo de vigilar el proceso de fortalecimiento de las instituciones democráticas e implementar las reformas recomendadas por la Misión de Alto Nivel.

Las amenazas de la oposición de abandonar los trabajos legislativos como una forma de inviabilizar los trabajos parlamentarios obligaron a los fujimoristas a iniciar un diálogo y negociación el 21 de agosto. Junto con algunos miembros de la sociedad civil, se reunieron bajo la mediación de la OEA, proponiéndose cuatro comisiones de trabajo a fin de llegar a acuerdos inmediatos.[[5]](#endnote-6)

Sea como fuere, a pocas semanas de iniciadas las negociaciones entre las partes, la turbulenta coyuntura política peruana se agudizó a partir del 14 de septiembre, cuando fue divulgado un video que mostraba al asesor del Servicio de Inteligencia Nacional-SIN, Vladimiro Montesinos, sobornando al Congresista recién electo Alberto Kuori, con el propósito de que el mismo pudiese ser incorporado a las filas del oficialismo. Ello acabó generando la crisis más grave del recién inaugurado período presidencial. En consecuencia, la oposición inmediatamente rompió el diálogo con el gobierno, exigió la expulsión del asesor del SIN y abandonó sus trabajos en el Congreso de la República.

TRANSICIÓN Y LEGISLATIVO

Efectivamente, la crisis política generada por la divulgación de los así llamados “Vladivideos” tuvo una repercusión tan amplia que el presidente Fujimori acabó convocando a nuevas elecciones – comicios en los que se comprometió a no participar –, así como a proceder a la desactivación del SIN. En los hechos, la crisis obligaba esta vez al presidente Fujimori a deshacerse de su socio y principal asesor, así como a la desactivación del SIN – anómala institución de singular relevancia en la estructura del poder régimen fujimorista*.*

Desde una perspectiva neoinstitucionalista, parece evidente que la crisis de septiembre de 2000 era el resultado de un error de cálculo electoral. Para los fines del presente artículo es pertinente tomar nota de la modificación del sistema electoral que presumiblemente daría ventaja al partido de gobierno (candidaturas independientes), y también de los vicios procesales postelectorales. *Ex post facto*, ahora sabemos queambos acontecimientos acabaron provocando que los resultados fueran poco previsibles. Si el régimen fujimorista hubiese aprobado, por ejemplo, una cláusula de barrera a los partidos que no obtuvieran el 5% de los votos válidos – proyecto que estaba en la agenda política de la época –, ello habría terminado eliminando partidos pequeños, bien como algunos movimientos independientes. Esa cláusula de barrera también hubiese provocado una ampliación artificial de la mayoría oficialista. El Cuadro 2 muestra la posible distribución de escaños y configuración del Congreso con esta hipótesis de funcionamiento de una cláusula de barrera:

<<<<<CUADRO 2 AQUÍ>>>>>

Así las cosas, delante de la dificultad ¨natural¨ de provocar un resultado postelectoral más favorable para el fujimorismo, desde la Casa de Pizarro se procedió al reclutamiento y a la cooptación de congresistas de la oposición. Pero, a partir de esta crisis desatada por los vídeos, existía un ánimo en la oposición para que el Congreso tomase el control de la transición política (Lopez, 2001: 63). Y en tales circunstancias, la base de sustentación del régimen fujimorista en el Congreso se resquebrajó. La mayoría parlamentaria de fujimoristas – y aliados – fue debilitada políticamente. Los ¨Vladivideos¨ desnudaban finalmente el esquema de corrupción político-electoral y demostraban que el gobierno actuó como una organización político-criminal en el poder.

Y con el pasar de los días se hizo más evidente que el gobierno fujimorista estaba perdiendo legitimidad, gobernabilidad y estabilidad. Obsérvese, por ejemplo, que el presidente Alberto Fujimori se vio obligado a desestructurar el núcleo duro del gobierno en un intento de mantener algo de legitimidad y para salir librado de las denuncias. Aun así, un proceso de vacancia de la Presidencia – por incapacidad moral – ya era promovido, en vista de las estrechas relaciones entre Fujimori y su asesor Montesinos.

El día 20 de septiembre, congresistas opositores abandonaron las conversaciones con el Gobierno y manifestaron una mayor radicalidad y presión en el parlamento. El accionar en bloque opositor produjo la paralización de los trabajos en el Legislativo, dejando sin quórum las sesiones del Pleno. Naturalmente, una de las principales demandas de los opositores era la conformación de una nueva Mesa Directiva del Congreso. Ello con el propósito de viabilizar proyectos de ley que diesen prioridad a los acuerdos pactados en la Mesa de Diálogo auspiciada por la OEA y que condujeran a la realización de elecciones generales, así como a la conformación de comisiones investigadoras sobre los escándalos propalados.

A los pocos días la oposición parlamentaria reanudó las negociaciones con el gobierno a través de la Mesa de Diálogo, pero bajo la condición de que el gobierno desactivara el Servicio de Inteligencia, y además se procesara penalmente al asesor Vladimiro Montesinos – entonces refugiado en Panamá, luego de amenazar con un golpe de estado.

Igualmente, se exigió la renuncia de controvertidos personajes que obstruían el proceso de democratización. Ese fue el caso del Presidente del Jurado Nacional de Elecciones, Alipio Montes de Oca; del Jefe de la Oficina de Procesos Electorales y responsable del fraudulento proceso electoral de 9 abril, José Portillo; y de la Fiscal de la Nación, Nélida Colán. Las Fuerzas Armadas, por su parte, jugaron un papel expectante en medio de la incerteza. Algo semejante se observó en las iniciativas de la Iglesia católica, de la sociedad civil y de los principales sindicatos de trabajadores.

Paralelamente, crecientes divergencias internas en el grupo parlamentario oficialista Alianza Electoral Perú 2000 acabaron provocando la pérdida del control del Congreso. El 28 de septiembre, los diputados fujimoristas se vieron obligados a plegarse a una tendencia mayoritaria de democratización. Un ejemplo de ello fue que el Pleno del Congreso votó – casi por unanimidad – la aprobación de la ley que desactivaba el SIN. Gradualmente, el grupo oficialista pasó a subordinarse a la agenda que los grupos opositores proponían, todo ello con el objetivo de dar legalidad a los acuerdos definidos en la Mesa de Diálogo auspiciada por la OEA. Y el propio mandato del gobierno de Fujimori fue drásticamente reducido hasta julio del 2001. Otro tanto fue resuelto en relación a la derogatoria de la Ley de homologación de magistrados titulares y provisionales, a la designación y ampliación del plazo de la Comisión Desactivadora del SIN, y a la convocatoria a nuevas elecciones para el 8 de abril del 2001 – comicios a ser realizados mediante la restitución del distrito electoral múltiple y de otras leyes que amparasen un proceso electoral más transparente, competitivo, participativo y democrático.

Asimismo, a fines de octubre de 2000, entre exabruptos y entrampamientos en la Mesa de Diálogo, los opositores ahora convertidos en mayoría se negaron a negociar una ley de amnistía que abarcaría tanto la violación de Derechos Humanos como los casos de corrupción y narcotráfico. En ese contexto general, el intempestivo retorno de Vladimiro Montesinos al Perú, el día 23 de octubre, desató una nueva crisis. Pues, bajo fórmulas de chantaje, Montesinos procuró una protección legal que obligó a Fujimori a destituir a los altos mandos de las tres armas que mantenían relaciones estrechas con el exasesor, obligándolo nuevamente a huir del país. En esa coyuntura, el teniente coronel Ollanta Humala y su hermano Antauro Humala se sublevaban en el sur del país, desconociendo la autoridad del presidente Fujimori y del alto mando militar. Fue un hecho aislado y sin elementos que se plegasen a ella, por lo que no tuvo mayor repercusión política; excepto que podía dejar entrever la descomposición y descontento al interior de las fuerzas armadas.

Finalmente, em 13 de noviembre, los opositores – ahora convertidos en mayoría parlamentaria (véase Cuadro 3) – lograron asumir la Presidencia del Congreso. Ese mismo día, Fujimori, cada vez más aislado y sin una base real de sustentación política en las diversas instancias del Estado, viajó a Brunei. Para asumir la presidencia del Congreso fue electo el diputado centroderechista Valentín Paniagua.[[6]](#endnote-7) Bajo su fugaz gestión, el referido tribuno restituyó inmediatamente a los tres magistrados del Tribunal Constitucional destituidos en 1997, estableciendo de esa manera una agenda legislativa autónoma a fin de redemocratizar el país, y garantizando un proceso de transición política pacífico. Ante las connotaciones penales derivadas de la amplia red de corrupción, que eventualmente lo alcanzaría, el día 19 de noviembre, Alberto Fujimori, desde Tokio, comunicó su renuncia a la Presidencia de la Republica. Este acto fue rechazado por el Congreso. Los representantes peruanos acabaron aprobando, en su lugar, la vacancia de la Presidencia por incapacidad moral.[[7]](#endnote-8) Y ante la renuncia de los vicepresidentes fujimoristas, Valentín Paniagua, en calidad de presidente del Congreso, asumió la conducción del país.

<<<<<CUADRO 3 AQUÍ>>>>>

La precipitada coyuntura marcó profundamente la transición política peruana. Esta tiene sus orígenes en el modelo institucional. El mismo que se caracteriza por el peculiar diseño de las relaciones Ejecutivo-Legislativo propenso a la erosión de la legitimidad del Ejecutivo. Si el sistema electoral produce una extremada fragmentación de la representación política, y especialmente por la simultaneidad de las elecciones parlamentarias y presidenciales. En este contexto, en el año 2000 se podía advertir que los opositores concederían poca tregua al Ejecutivo. Ante la necesidad de activar mecanismos parlamentarios de información y control, y bajo la lógica del juego político de suma cero sostenida en toda la crisis política por el régimen, los actores políticos en la oposición finalmente actuaron eficientemente en el Legislativo para demandar una transición política por ruptura.

Cabe resaltar que, acompañados por la *fortuna* frente a la coyuntura desatada por los videos de Vladimiro Montesinos, no cabía sino activar los mecanismos de rendición de cuentas interinstitucional, de control y de información necesarias, y ejercer además la denominada responsabilidad política. Por otra parte, cabe destacar la *virtud* de los opositores quienes, aún sujetos a las vallas institucionales delimitadas por el régimen, superaron una crisis política tras otra, posicionándose coherentemente, superando el inicial escenario político de negociación, y finalmente apropiándose del control del proceso de transición política.

CONCLUSIONES

Se puede observar que las instituciones preexistentes a la transición política contribuyeron a definir tanto la naturaleza del proceso como los límites y el papel que la institución legislativa interpretaría en ese contexto. En esta perspectiva, la variable institucional no fue adecuadamente auscultada en la literatura disponible sobre el problema-objeto. Ello es evidente cuando se compara la referida variable institucional frente a otras variables disponibles – incluyendo a las acciones de la sociedad civil, de las elites políticas, de la crisis económica o la presión de la comunidad internacional. En este sentido, es pertinente agregar que, es la combinación, articulación y acción conjunta de todas aquellas fuerzas profundas lo que finalmente caracterizó la transición política peruana.

De acuerdo al contexto en el que se desarrolló la transición política, se puede observar que opositores y gobierno se reconocieron, en medio de un proceso de transición. En general, las partes concordaron en la necesidad de modificar las reglas formales del juego político. Sin embargo, de acuerdo a las posiciones asimétricas entre los actores, en este caso favorable al Ejecutivo autoritario que conducía con éxito el control de las reglas de juego de la transición, una secuencia precipitada de acontecimientos desfavorables acabó acelerando la erosión de la legitimidad del Ejecutivo. Consecuentemente, de forma gradual, el oficialismo fue perdiendo el control de la conducción del proceso transitorio y, por consiguiente, no consiguió validar acuerdos favorables a éste. Así, la institución legislativa se convirtió en la piedra angular para formalizar arreglos puntuales en el proceso de redemocratización.

Dada la fuga del propio presidente de la República, el fujimorismo no consiguió imponer salvaguardas ni ¨garantías¨ que limitasen el proceso de redemocratización. Tampoco se evidenció la emergencia de una coalición de poderes fácticos que hubiese podido impedir la caída del régimen y con ello la restitución de la democracia. Así la naturaleza de la transición peruana está plenamente identificada como una ruptura. Esto es, una transición sin espacio para los remanentes autoritarios. En consecuencia, el legislativo peruano aportó en la estrategia de transición del régimen un alto grado de contingencia, que ante situaciones imprevistas imponía una situación de ruptura.

Algunos analistas han señalado que el proceso de transición política fue producto de factores externos. En realidad, la comunidad internacional, a pesar de las críticas al proceso electoral, acabó reconociendo a Fujimori como Presidente en el 2000.[[8]](#endnote-9) La presión internacional fue importante, pero no gravitó para el desencadenamiento de los hechos que precipitaron el proceso de transición. A lo más que se llegó fue a la promoción de la mediación de la OEA, pero nunca a la amenaza contundente de aislar al Perú de la comunidad internacional, si el gobierno no mostraba disposición al diálogo con los actores constituidos en torno a las demandas por democracia.

Se infiere de lo discutido que la arena legislativa se constituyó como un espacio de demanda para generar cambios en el sistema político. Podemos afirmar que el legislativo jugó un papel de contención del desborde del conflicto o situaciones de imprevisibles consecuencias, afirmándose la institución como el espacio por excelencia para reorientar el régimen político hacia un proceso de democratización. Así desde el inicio de la crisis, la formalidad jurídica era necesaria porque proveía de legitimidad legal-racional para validar a los acuerdos en torno a la transición, con base a la modificación de las reglas institucionales a fin de conducir un proceso político controlado y no violento.

La transición por ruptura ofreció una oportunidad para desplazar a los remanentes autoritarios, este distanciamiento fue temporal dado que los protagonistas de la post-transición en la arena legislativa, buscaron restablecer reglas semejantes en el campo electoral y los cambios institucionales acabaron siendo menos relevantes de lo esperado. Se impuso una visión procedimental de democracia la misma que impidió el llamado a un nuevo pacto político por medio de una Asamblea Constituyente omisión que ha configurado hasta el presente, una serie de conflictos institucionales con desafíos pendientes de consolidación democrática, los mismos que se reflejan en el actual deterioro de la calidad de la democracia en el Perú.

1. NOTAS

   ? En 1992, el partido de gobierno obtuvo 55% de la representación del Congreso. En 1995, el 56%. Se esperaba que, de acuerdo a su posición hegemónica, el fujimorismo se afirmaría en esa tendencia en el 2000. [↑](#endnote-ref-2)
2. Igualmente, el proceso electoral de 2000 inició con una serie de comprobadas irregularidades, tales como: a) fallas técnicas y la inscripción irregular en el padrón electoral de un millón y medio de ciudadanos, b) impresión de cédulas de votación defectuosas – incluso algunas ya marcadas –, c) irregularidades de índole política, como el hostigamiento a los personeros de los partidos opositores, y d) el uso indebido de los recursos del Estado a favor del presidente-candidato. [↑](#endnote-ref-3)
3. Un objetivo conexo de la oposición parlamentaria peruana era asumir el control de la Mesa Directiva del nuevo Congreso. En tal hipótesis, la oposición democrática podría asumir la conducción de los trabajos del legislativo y enderezar el régimen autoritario, pero a los pocos días de la elección se desvanecieron las esperanzas. Algunos de sus miembros silenciosamente se pasaron al oficialismo. El país acompañó los casos más escandalosos de transfuguismo siendo denunciado por la revista Caretas (Junio 15, 2000a y Junio 22, 2000b). Hasta el 22 de junio de 2000 fueron en total 8 congresistas los desertores, siendo que uno de ellos – el diputado Alberto Kouri – acabó protagonizando el mayor escándalo de compra de congresistas. De ese modo, los opositores pasaron a ser nuevamente minoría en el Congreso. [↑](#endnote-ref-4)
4. Además de ganar la Mesa Directiva del Congreso, el fujimorismo copó todas las comisiones ordinarias, dando muestras de inflexibilidad y continuidad en el manejo arrogante y autoritario en el Congreso de la República. [↑](#endnote-ref-5)
5. Entre los acuerdos se exigía la reincorporación del Perú a la Corte Interamericana de Derechos Humanos, la reestructuración de los servicios de inteligencia y la restitución en el cargo de tres miembros del Tribunal Constitucional. [↑](#endnote-ref-6)
6. Valentín Paniagua Corazao fue electo al Congreso de la República por el partido Acción Popular con sólo 14.335 votos. [↑](#endnote-ref-7)
7. De acuerdo al Acta de la Sesión Extraordinaria del Pleno del Congreso de la República del 21 de noviembre del 2000, los parlamentarios fujimoristas pretendieron debatir la carta de renuncia del presidente Fujimori. Dado que dicho documento no tenía refrendo ministerial, la carta no tenía validez. Por el contrario, ante un quórum de 82 representantes, fue aprobado el proyecto de Resolución Legislativa de declaración de permanente incapacidad moral del presidente de la República y vacancia de la Presidencia de la República, por 62 votos a favor, nueve en contra y nueve abstenciones. [↑](#endnote-ref-8)
8. Entre el 30 de agosto y el 1 de septiembre del 2000, Fujimori viajó a la ciudad de Brasilia para participar en la Cumbre Presidencial de América del Sur, donde se evidenció un reconocimiento tácito de los presidentes y gobiernos de países vecinos. Algunos pocos días después, entre 6 y 8 de septiembre, el mandatario peruano participó, en Nueva York, en la Cumbre del Milenio de las Naciones Unidas.

   REFERENCIAS

   Apoyo S.A.

   1999 *Informes de opinión. Meses de abril, mayo, junio, Julio, agosto, setiembre de 1999*. Lima: Apoyo.

   Arturi, Carlos

   2001 “O debate teórico sobre mudança de regime político: O caso brasileiro.” *Revista de Sociologia e Política* 17 (Noviembre): 11-31.

   Bowen, Sally y Jane Holigan

   2003 *El espía imperfecto.* Lima: Peisa.

   Caretas

   1999a “El repunte de la gran fruta.” *Caretas* 1573 (Junio 22). <http://www2.caretas.pe/1999/1573/chino/chino.htm> (acceso Enero 10, 2018).

   1999b ¨Mienten Mienten.¨ *Caretas* 1584 (Septiembre 15). http://www2.caretas.pe/1999/1584/mienten/mienten.htm (acceso Enero 12, 2018).

   2000a ¨El Club de Judas.¨ *Caretas* 1623 (Junio 15). <http://www2.caretas.pe/2000/1623/articulos/judas.phtml> (acceso Enero 16, 2018).

   2000b ¨El juego sucio del poder.¨ *Caretas* 1624 (Junio 22). <http://www2.caretas.pe/2000/1624/articulos/poder.phtml> (acceso Enero 13, 2018).

   2000c ¨Diálogo con fórceps.¨ *Caretas* 1632 (Agosto 17). <http://www2.caretas.pe/2000/1632/articulos/forceps.phtml> (acceso Enero 15, 2018).

   Cotler, Julio

   2000 “La gobernabilidad en el Perú. Entre el autoritarismo y la democracia,” pp. 13-75 en Julio Cotler y Romeo Grompone (eds.), *El fujimorismo Ascenso y caída de un régimen autoritario.* Lima: Instituto de Estudios Peruanos.

   Cotler, Julio y Romeo Grompone

   2000 *El fujimorismo Ascenso y caída de un régimen autoritario*. Lima: Instituto de Estudios Peruanos.

   Datun S.A.

   1999 *Informes de opinión. Meses de abril, mayo, junio, Julio, agosto, setiembre de 1999*. Lima: Datun.

   Donno, Daniela

   2013 “Elections and Democratization in Authoritarian Regimes.” *American Journal of Political Science* 57 (July): 703-716.

   Ford Deza, Elaine

   2004 “El proceso de transición democrática en el Perú y el liderazgo de Toledo.” *Revista Enfoques* 2: 143-156.

   Foweraker, Joe

   2004 ¨Democratization, Transformation, Transition, Consolidation: Democratization in Latin America,¨ pp. 65-89 in K. Nash and A. Scott (eds), *The Blackwell Companion to Political Sociology.* Oxford: Blackwell.

   Guilhot, Nicolas y Schmitter, Philippe

   2000 “De la transition à la consolidation: une lecture rétrospective des democratization studies.“ *Revue Française de Science Politique* 50 (août-oct): 615-631.

   Karl, Terry

   1991 “Dilemas de la democratización en América Latina.” *Foro Internacional* XXXI (Enero-Marzo): 388-417.

   Kenney, Charles

   2004 “Muerte y renascimiento de un sistema de partidos Perú. 1978-2001.” *Elecciones* 4: 237-291.

   Levitsky, Steven and Lucan Way

   2002 “The Rise of Competitive Authoritarianism.” *Journal of Democracy* 13 (2): 51-65.

   Levitsky, Steven and Lucan Way

   2010 *Competitive Authoritarianism: Hybrid Regimes after the Cold War.* New York: Cambridge University Press.

   Lindberg, Staffan

   2009 *Democratization by Elections: A New Mode of Transition*. Baltimore: John Hopkins University Press.

   Linz, Juan y Alfred Stepan

   1999 *A Transição e Consolidação da Democracia: A experiência do Sul da Europa e da América do Sul*. São Paulo: Paz e Terra.

   Lopez, Sinésio

   2001 “Perú 2000-2001: la transición democrática y el gobierno de transición,” pp. 59-89 en Comisión Andina de Juristas (ed.), *Las tareas de la transición democrática*. Lima: CAJ.

   Nohlen, Dieter y Bernhard Thibaut

   1995 ¨Investigación sobre la transición en América Latina: enfoques, conceptos, tesis,¨ pp. 28-58 en Dieter Nohlen (ed.), *Democracia y neocrítica en América Latina: en defensa de la transición*. Madrid: Iberoamericana.

   O`Donnell, Guillermo

   1982 *El Estado Burocrático Autoritario*. Buenos Aires: Editorial Belgrano.

   O`Donnell, Guillermo y Philippe Schmitter

   1991 *Transiciones desde un Gobierno Autoritario. Conclusiones tentativas sobre las democracias inciertas.* Buenos Aires: Paidos.

   Roessler, Philip G. and Marc M. Howard

   2006 “Liberalizing Electoral Outcomes in: Competitive Authoritarian regimes.” *American Journal of Political Science* 50 (April): 365-381.

   Roessler, Philip G. and Marc M. Howard

   2009 “Post-Cold War Political Regimes: When do Elections Matter?,” pp. 101-127 in Staffan Lindberg (ed.), *Democratization by Elections.* Baltimore: Johns Hopkins University Press.

   Soria, Lujan, Daniel

   2009 “La defensa de la democracia dentro y fuera de las fronteras. El proceso político de la mesa de diálogo de la OEA del año 2000.” Lima: Tesis para optar al grado académico de Magíster en Ciencia Política por la Pontificia Universidad Católica del Perú.

   Seifert Bonifaz, Manuel

   2014 *Colapso de los partidos nacionales y auge de los partidos regionales. Las elecciones regionales y municipales 2002-2010.* Lima: PUCP.

   Shirah, Ryan

   2015 “Electoral authoritarianism and political unrest.” *International Political Science Review* 37 (4): 470-484.

   Tanaka, Martín

   1999 *Los Partidos Políticos en el Perú. 1992-1999: Estabilidad, sobrevivencia y política mediática*. Lima: IEP.

   2001 "¿Crónica de una muerte anunciada? Determinismo, voluntarismo, actores y poderes estructurales en el Perú, 1980-2000," pp. 57-112 en J. Marcus y M. Tanaka (eds.), *Lecciones del final del fujimorismo.* Lima: Instituto de Estudios Peruanos.

   2005. *Democracia sin partidos. Perú 2000-2005: los problemas de representación y las propuestas de reforma política*. Lima: IEP.

   Transparencia

   *Informes. 2000. Datos nº 21 y Datos nº 35*. Transparencia. [www.transparencia.org.pe](http://www.transparencia.org.pe/) (acceso Enero 15, 2018).

   Tuesta, Fernando

   1995 *Sistema de Partidos Políticos en el Perú: 1978-1995*. Lima: Fundación Friedrich Ebert.

   1996 “El impacto del sistema electoral en el sistema político peruano,” pp. 23-45 Fernando Tuesta (ed.), *Los enigmas del poder: Fujimori 1990-1996*. Lima: Fundación Friedrich Ebert.

   Universidad de Lima

   1999 *Informes de opinión. meses de abril, mayo, junio, julio, agosto y setiembre de 1999*. Lima: Universidad de Lima.

   CUADRO 1

   Representación en el Congreso para el periodo 1995-2000

   Elecciones19952000EscañosVotosEscañosVotosCambio 90/Nueva Mayoría672,277,423------Alianza Electoral Perú 2000------524,189,018Unión por el Perú17611,8043254,582Frente Independiente Moralizador6213,7779751,323Code/País Posible5181,397------País Posible------292,308,635Renovación3130,060------Avancemos------3307,188Obras287,252------Movimiento Independiente Agrario134,463------Frente Popular Agrícola146,9902216,953Somos Perú------8715,396Solidaridad Nacional------5399,985Partido Aprista Peruano8285,5266546,930Acción Popular41463245,115Partido Popular Cristiano3135,060------Izquierda Unida282,061------Perú al 2000/Fntc146,728------Votos válidos4,371,0379,935,125Votos en blanco502,774703,345Votos nulos3,359,8691,304,340Votos emitidos8,233,68011,942,810Abstención 4,046,8582,624,657Electores 12,280,53814,567,467Total 120120Fuente: Oficina Nacional de Procesos Electorales.

   CUADRO 2

   Probable distribución de escaños con la barrera del 5%

   Escaños sin la barrera del 5%VotosEscaños con la barrera del 5%% de escañosAlianza Electoral Perú 2000 (Gobierno)524,189,01849,259,40Frente Independiente Moralizador (Oposición)9751,3238,810,56País Posible (Oposición)292,308,63527,132,52Somos Perú (Oposición)8715,3968,410,08Partido Aprista Peruano (Oposición)6546,9306,57,80Votos:8,511,302100%Fuente: Elaboración propia.

   CUADRO 3

   Representación en el Congreso, antes y después del 2000

   Realineamiento partidario en el año 2000Escaños antes del 28/7 (a)Escaños al 31/8 (b)Escaños al 30/9 (c)Escaños al 13/11 (d)Escaños al 13/12*Grupo parlamentario gobiernista*Alianza Electoral Perú 20005267 (e)5653----Cambio 90------------20-Vamos Vecino------------21-Con Fuerza Perú------------6Frente Popular Agrícola2------------Avancemos*32---------Subtotal5769565347*Grupos parlamentarios de oposición*UPP-AP66668-Unión por el Perú (3 Congresistas)-Acción Popular (3 Congresistas)Frente Independiente Moralizador98888País Posible2925212121Somos Perú87777Solidaridad Nacional5------------Partido Aprista Peruano65555Subtotal6351474747*Declarados Independientes:*Tránsfugas------4 (f)4---No agrupados------101310Grupo Parlamentario Independiente------------8Grupo Parlamentario Unión Parlamentaria---------------Avancemos (2 Diputados)---------22Total general120120119**119119Fuente: Elaboración propia

   a: Electos según el resultado de las elecciones del 9 de abril.

   b: Día en que se celebró la elección de la Mesa Directiva del Congreso.

   c: Una semana después de la difusión de los videos de Montesinos y el C. Alberto Kuori.

   d: Fecha en que Censuran a la Presidenta del Congreso electa el 28 de abril.

   e: Congresistas que se pasaron a las filas del gobierno Luís Cáceres Velásquez y Roger Cáceres Velásquez (FIA), José Elías Ávalos (Avancemos), Rudy Rodríguez (Apra), Gregorio Ticona (SP), Jorge Polack, Eduardo Farah, Miguel Mendoza del Solar, Acuña Peralta y Luna Gálvez (SN), Edilberto Canales, Mario Gonzáles Inga, Antonio Palomo y Alberto Kuori (PP), Waldo Ríos (FIM).

   f: Salieron de PP: Burgos Montenegro, Marsano Chumbez, Núñez Del Castillo y José Eduardo Villena Vela.

   g: Salieron de la Alianza Perú 2000: Cecilia Martínez del Solar (20/9), Cambio 90, Gregorio Ticona (Perú 2000) (25/9), Fernán Altuve-Febres Flores, (26/9), Jorge Pollack (27/9), Joaquín Ormeño (26/9), Moisés Wolfenson (26/9), Miguel Mendoza del Solar (28/09), Eduardo Farah (28/09), Mario Gonzáles Inga (28/09), Antonio Palomo (29/09), luego les seguirían Miriam Schennone, Ángel Bartra, y Waldo Ríos.

   * Declarada “oposición constructiva” pero que votaba y defendía al gobierno.

   ** 119 diputados en vista de que el diputado Alberto Kuori fue separado de las filas gobiernistas y desaforado del Congreso. [↑](#endnote-ref-9)
